# Supplementary material for: Evolutionary Algorithm-Based Crystal Structure Prediction of CuxZnyOz Ternary Oxides
Source: MDPI journal article supplement (doi:10.3390/molecules28165986), 2023-08-10
Supplement: s1 [file s1]

Supplementary Materials for

## **Evolutionary Algorithm -based Crystal Structure Prediction of $\text{Cu}_x\text{Zn}_y\text{O}_z$ Ternary Oxides**

**Mikhail S. Kuklin and Antti J. Karttunen \***

Department of Chemistry and Materials Science, Aalto University, P.O. Box 16100, FI-00076 Espoo, Finland

\* Correspondence: antti.karttunen@aalto.fi

### **Contents**

**Table S1.** USPEX input file for  $\text{Cu}_x\text{Zn}_y\text{O}_z$  crystal structure prediction.

**Table S2.** Quantum Espresso input files used in USPEX simulations.

**Table S3.** CRYSTAL input files used in USPEX simulations.

**Table S1. USPEX input files for Cu<sub>x</sub>Zn<sub>y</sub>O<sub>z</sub> crystal structure prediction.**

USPEX/Quantum Espresso input file for composition Cu<sub>2</sub>ZnO<sub>2</sub>:

```
*****
*          TYPE OF RUN AND SYSTEM          *
*****

USPEX : calculationMethod (USPEX, VCNEB, META)
300   : calculationType (dimension: 0-3; molecule: 0/1; varcomp: 0/1)
1     : optType (optimise by: 1=enthalpy, 2=volume, 3=hardness,...)
1     : AutoFrac

% atomType
Cu Zn O
% EndAtomType

% numSpecies
2 1 2
% EndNumSpecies

% symmetries
2-230
% EndSymmetries

*****
*          POPULATION                      *
*****
20   : populationSize
30   : numGenerations
10   : stopCrit
0    : reoptOld
*****
*          VARIATION OPERATORS            *
*****
0.50 : fracGene
0.20 : fracRand
0.10 : fracAtomsMut
0.10 : fracLatMut
0.10 : fracPerm

*****
*          DETAILS OF AB INITIO CALCULATIONS *
*****
% abinitioCode
8 8 8
% EndAbinit

% KresolStart
0.14 0.12 0.08
% Kresolend
```

## USPEX/CRYSTAL input file for composition Cu<sub>2</sub>Zn<sub>2</sub>O<sub>4</sub>:

```

*****
*           TYPE OF RUN AND SYSTEM           *
*****
USPEX : calculationMethod (USPEX, VCNEB, META)
300   : calculationType (dimension: 0-3; molecule: 0/1; varcomp: 0/1)
1     : optType (optimise by: 1=enthalpy, 2=volume, 3=hardness,...)
1     : AutoFrac

% atomType
Cu Zn O
% EndAtomType

% numSpecies
2 2 4
% EndNumSpecies

% symmetries
2-230
% EndSymmetries

*****
*           POPULATION                       *
*****
20   : populationSize
30   : numGenerations
10   : stopCrit
0    : reoptOld
*****
*           VARIATION OPERATORS              *
*****
0.50 : fracGene
0.20 : fracRand
0.10 : fracAtomsMut
0.10 : fracLatMut
0.10 : fracPerm
*****
*           CONSTRAINTS                      *
*****
% IonDistances
1.7 1.7 1.3
1.7 1.8 1.4
1.3 1.4 1.0
% EndDistances

*****
*   DETAILS OF AB INITIO CALCULATIONS       *
*****
% abinitioCode
20 20 20
% EndAbinit

% KresolStart
0.14 0.12 0.08
% Kresolend

0 : doSpaceGroup

```

USPEX input files for other Cu<sub>x</sub>Zn<sub>y</sub>O<sub>z</sub> compositions are similar but with different number of atoms (*numSpecies* keyword).

**Table S2. Quantum Espresso input files used within USPEX simulations.**

First relaxation step:

```
&CONTROL
  calculation = 'vc-relax'
  restart_mode = 'from_scratch'
  prefix      = 'cu2zno2'
  wf_collect  = .false.
  disk_io     = 'none'
  etot_conv_thr=1.0D-3
  forc_conv_thr=1.0D-2
  nstep      = 25
/
&SYSTEM
 ibrav      = 0
  nat       = AAAA
  ntyp      = BBBB
  ecutwfc   = 40
  ecutrho   = 200
  nosym     = .true.
  occupations = 'smearing'
  smearing  = 'gaussian'
  degauss   = 0.02
/
&ELECTRONS
  conv_thr  = 5.D-04
  mixing_beta = 0.7
  electron_maxstep = 100
/
&IONS
/
&CELL
  cell_factor = 2.0
/
ATOMIC_SPECIES
Cu 63.546 cu_pbe_v1.2.uspp.F.UPF
Zn 65.38  zn_pbe_v1.uspp.F.UPF
O  15.999 o_pbe_v1.2.uspp.F.UPF
```

## Second relaxation step:

```
&CONTROL
  calculation = 'vc-relax'
  restart_mode = 'from_scratch'
  prefix      = 'cu2zno2'
  wf_collect  = .false.
  disk_io     = 'none'
  etot_conv_thr=1.0D-3
  forc_conv_thr=1.0D-2
  nstep       = 25
/
&SYSTEM
  ibrav       = 0
  nat         = AAAA
  ntyp        = BBBB
  ecutwfc     = 40
  ecutrho     = 200
  nosym       = .true.
  occupations = 'smearing'
  smearing    = 'gaussian'
  degauss     = 0.02
/
&ELECTRONS
  conv_thr    = 1.D-05
  mixing_beta = 0.7
  electron_maxstep = 100
/
&IONS
/
&CELL
  cell_factor = 2.0
/
ATOMIC_SPECIES
Cu 63.546 cu_pbe_v1.2.uspp.F.UPF
Zn 65.38  zn_pbe_v1.uspp.F.UPF
O 15.999  o_pbe_v1.2.uspp.F.UPF
```

### Third relaxation step:

```
&CONTROL
  calculation = 'vc-relax'
  restart_mode = 'from_scratch'
  prefix      = 'cu2zno2'
  wf_collect  = .false.
  disk_io     = 'none'
  etot_conv_thr=1.0D-4
  forc_conv_thr=1.0D-3
  nstep       = 30
/
&SYSTEM
  ibrav       = 0
  nat         = AAAA
  ntyp        = BBBB
  ecutwfc     = 40
  ecutrho     = 200
  nosym       = .true.
  occupations = 'smearing'
  smearing    = 'gaussian'
  degauss     = 0.02
/
&ELECTRONS
  conv_thr    = 1.D-06
  mixing_beta = 0.7
  electron_maxstep = 100
/
&IONS
/
&CELL
  cell_factor = 2.0
/
ATOMIC_SPECIES
Cu 63.546 cu_pbe_v1.2.uspp.F.UPF
Zn 65.38  zn_pbe_v1.uspp.F.UPF
O  15.999 o_pbe_v1.2.uspp.F.UPF
```

**Table S3. CRYSTAL input files used within USPEX simulations**

Basis set section is omitted. Some of the USPEX simulations were implemented with TOLINTEG 8, 8, 8, 8 and 16 for the third relaxation step. Some minor changes in the input files (for example, *FMIXING*) are also possible depending on the studied composition.

First relaxation step:

```
###  
EXTERNAL  
OPTGEOM  
MAXCYCLE  
30  
TOLDEE  
4  
TOLDEG  
0.03  
TOLDEX  
0.12  
ENDOPT  
END  
#Basis set  
99 0  
END  
DFT  
PBE0  
LGRID  
SPIN  
END  
TOLINTEG  
7 7 7 7 14  
TOLDEE  
5  
PPAN  
ATOMSPIN  
2  
1 1 2 -1  
FMIXING  
80  
SMEAR  
0.005  
MAXCYCLE  
30  
EXCHSIZE  
30000000  
BIPOSIZE  
30000000  
#Shrinking factor
```

## Second relaxation step:

```
###  
EXTERNAL  
OPTGEOM  
MAXCYCLE  
30  
TOLDEE  
4  
TOLDEG  
0.0075  
TOLDEX  
0.03  
ENDOPT  
END  
#Basis set  
99 0  
END  
DFT  
PBEO  
LGRID  
SPIN  
END  
TOLINTEG  
7 7 7 7 14  
TOLDEE  
5  
PPAN  
ATOMSPIN  
2  
1 1 2 -1  
FMIXING  
80  
SMEAR  
0.002  
MAXCYCLE  
50  
EXCHSIZE  
30000000  
BIPOSIZE  
30000000  
#Shrinking factor
```

### Third relaxation step:

```
###  
EXTERNAL  
OPTGEOM  
MAXCYCLE  
50  
TOLDEE  
5  
TOLDEG  
0.0015  
TOLDEX  
0.006  
ENDOPT  
END  
#Basis set  
99 0  
END  
DFT  
PBE0  
LGRID  
SPIN  
END  
TOLINTEG  
7 7 7 7 14  
TOLDEE  
6  
PPAN  
ATOMSPIN  
2  
1 1 2 -1  
FMIXING  
80  
MAXCYCLE  
50  
EXCHSIZE  
30000000  
BIPOSIZE  
30000000  
#Shrinking factor
```
